# Supplementary material for: Theoretical investigation on catalytic mechanisms of oxygen reduction and carbon monoxide oxidation on the MnNx system
Source: Royal Society of Chemistry journal article supplement (doi:10.1039/d0nj03756g), 2020-01-01
Supplement: d0nj03756g1.pdf [file d0nj03756g1.pdf]

## Support information

# Theoretical investigation on the catalytic mechanisms of oxygen reduction and carbon monoxide oxidation on MnNx system

Mingming Luo,<sup>a</sup> Zhao Liang,<sup>a</sup> Mingwei Chen,<sup>a</sup> Chao Liu,<sup>a,b</sup> \* Xiaopeng Qi,<sup>a</sup> Shaik Gouse Peera,<sup>c</sup> Juan Liu,<sup>d</sup> Tongxiang Liang<sup>a,\*</sup>

<sup>a</sup> Faculty of Materials Metallurgy and Chemistry, Jiangxi University of Science and Technology, Ganzhou 341000, China

<sup>b</sup> State Key Laboratory of Metastable Materials Science and Technology, Yanshan University, Qinhuangdao 066004, China

<sup>c</sup> Department of Environmental Science and Engineering, Keimyung University, Daegu 42601, Republic of South Korea

<sup>d</sup> Department of Mining and Materials Engineering, McGill University, Montreal, QC H3A0C5, Canada

\* Corresponding Authors.

E-mail address: liuchao198967@126.com (Chao Liu) and liang\_tx@126.com (Tongxiang Liang).

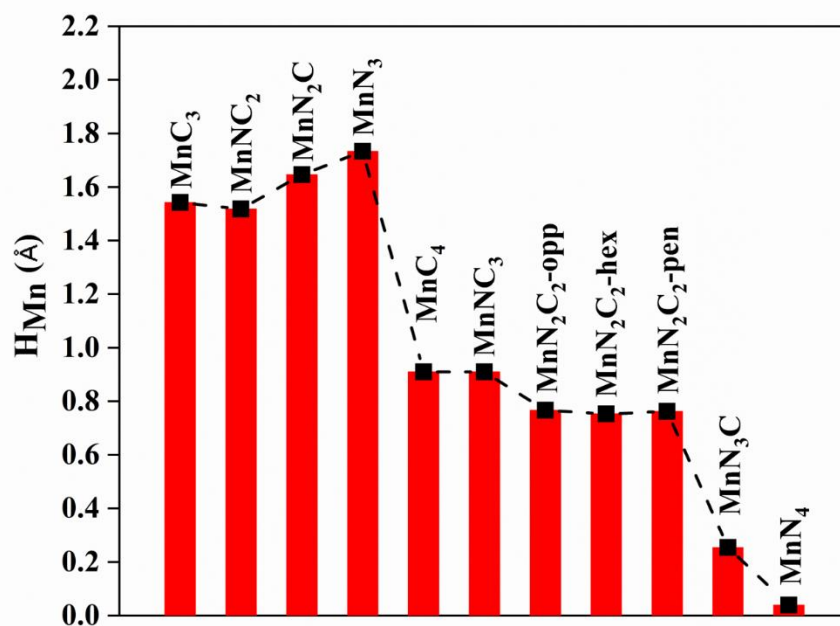

**Fig. S1.** The measured height of the Mn atom with respect to the graphene basal plane.

|                                      | Electrophilic | Nucleophilic |                                      | Electrophilic | Nucleophilic |
|--------------------------------------|---------------|--------------|--------------------------------------|---------------|--------------|
| MnC <sub>3</sub>                     |               |              | MnNC <sub>2</sub>                    |               |              |
| MnN <sub>2</sub> C                   |               |              | MnN <sub>3</sub>                     |               |              |
| MnC <sub>4</sub>                     |               |              | MnNC <sub>3</sub>                    |               |              |
| MnN <sub>2</sub> C <sub>2</sub> -opp |               |              | MnN <sub>2</sub> C <sub>2</sub> -hex |               |              |
| MnN <sub>2</sub> C <sub>2</sub> -pen |               |              | MnN <sub>3</sub> C                   |               |              |
| MnN <sub>4</sub>                     |               |              |                                      |               |              |

**Fig. S2.** The Fukui function of MnN<sub>x</sub>, the isosurface value is  $4 e/\text{Å}^3$ .

**Table S1.** Optimized models of different MnN<sub>x</sub> configurations and their corresponding ideal \*OOH, \*O and \*OH adsorption configurations.

| Pristine | *O | *OH | *OOH |
|----------|----|-----|------|
|----------|----|-----|------|

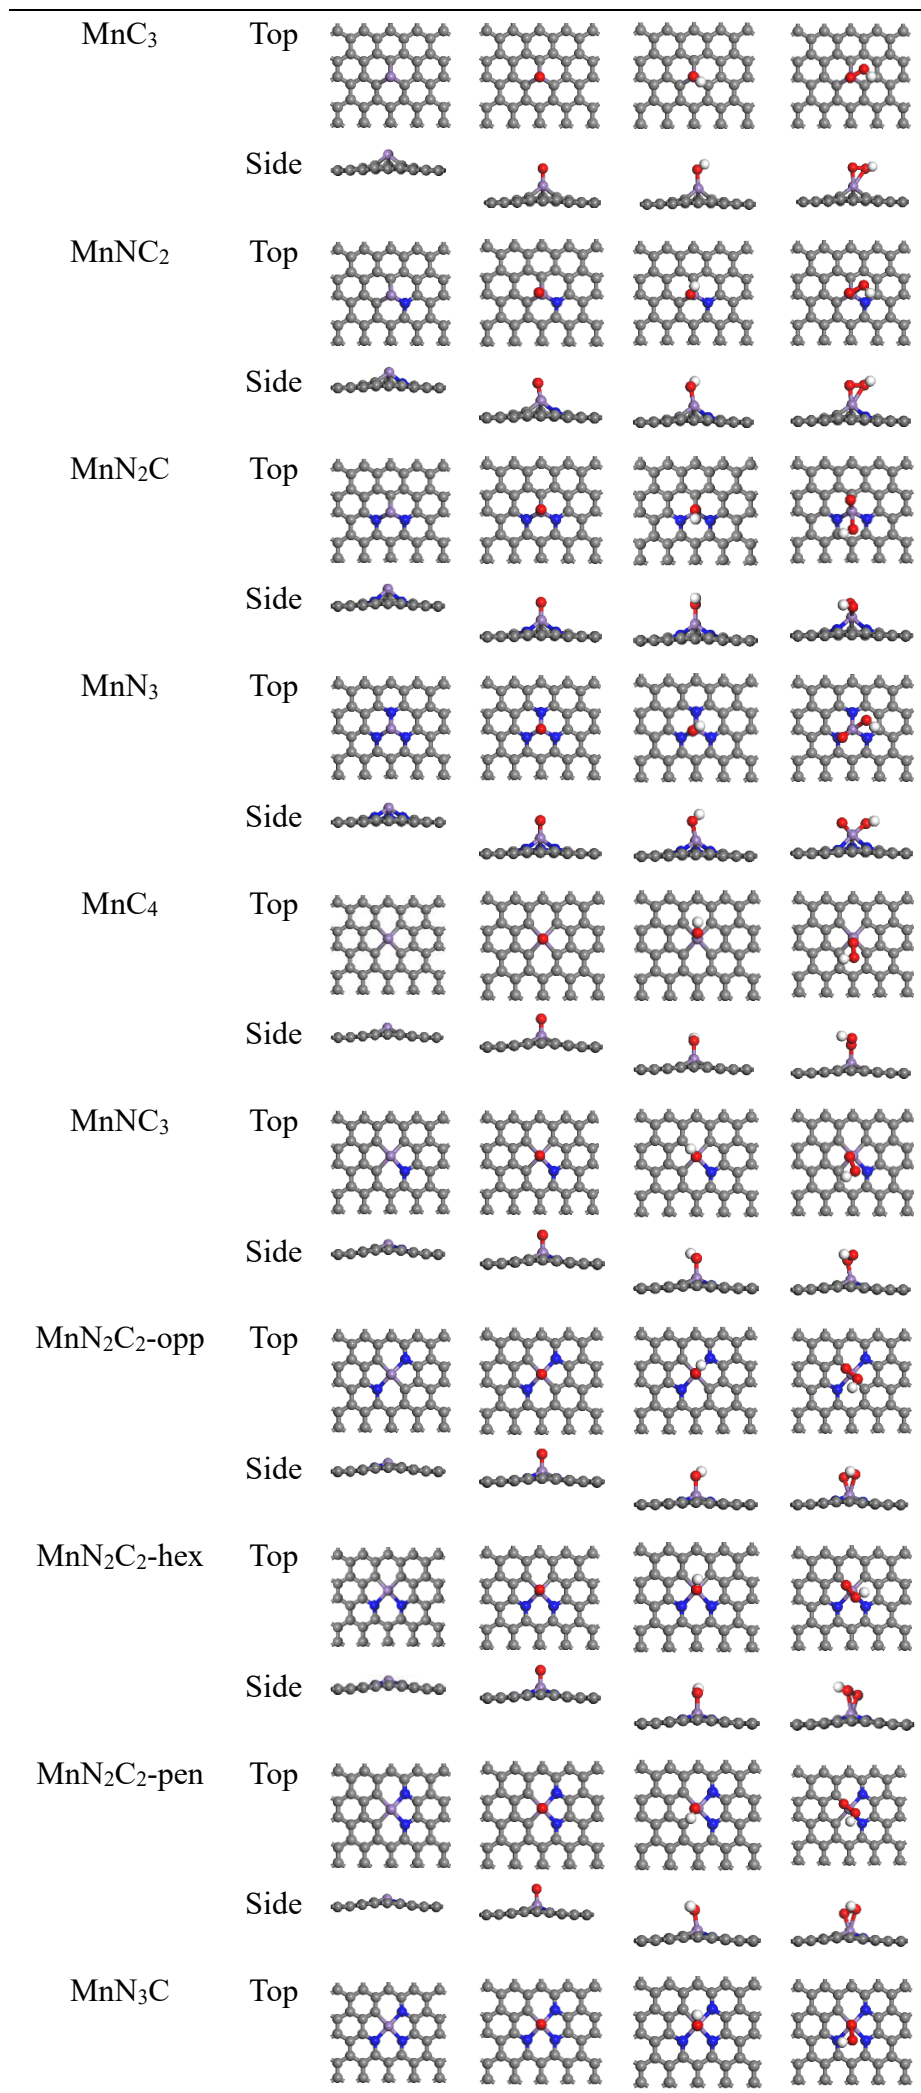

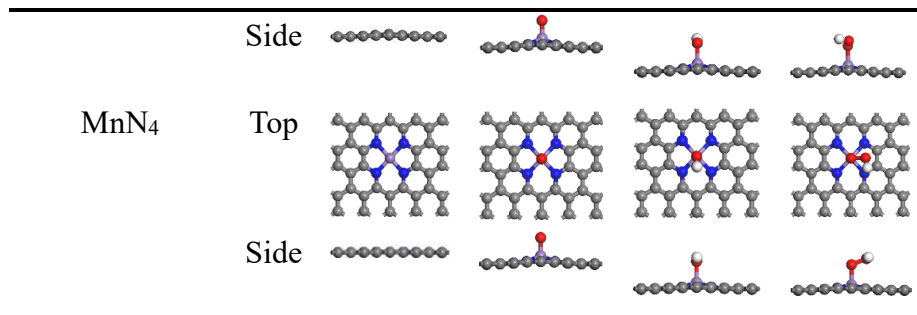

**Table S2.** Adsorption free energy ( $\Delta G_{\text{ads}}$ , eV) of ORR intermediates (OOH, OH and O) in MnN<sub>x</sub>

| Structures                           | G*OOH | G*O    | G*OH   |
|--------------------------------------|-------|--------|--------|
| MnC <sub>3</sub>                     | 1.877 | -0.060 | -1.317 |
| MnNC <sub>2</sub>                    | 1.633 | -0.846 | -1.347 |
| MnN <sub>2</sub> C                   | -     | -1.062 | -1.281 |
| MnN <sub>3</sub>                     | -     | -1.280 | -1.277 |
| MnC <sub>4</sub>                     | 2.516 | -0.464 | -0.644 |
| MnNC <sub>3</sub>                    | 2.660 | 0.031  | -0.426 |
| MnN <sub>2</sub> C <sub>2</sub> -opp | 2.634 | 0.070  | -0.362 |
| MnN <sub>2</sub> C <sub>2</sub> -hex | 2.736 | 0.237  | -0.279 |
| MnN <sub>2</sub> C <sub>2</sub> -pen | 2.634 | 0.015  | -0.211 |
| MnN <sub>3</sub> C                   | 2.727 | 0.367  | -0.243 |
| MnN <sub>4</sub>                     | 2.996 | 0.629  | 0.019  |

**Table S3.** Free energy variations (eV) of the ORR pathways for MnN<sub>x</sub> structures and their corresponding theoretical overpotentials (V)

| Structures                           | $\Delta G_1$ | $\Delta G_2$ | $\Delta G_3$ | $\Delta G_4$ | $\eta$ |
|--------------------------------------|--------------|--------------|--------------|--------------|--------|
| MnC <sub>3</sub>                     | -3.043       | -1.938       | -1.257       | 1.317        | 2.547  |
| MnNC <sub>2</sub>                    | -3.287       | -2.479       | -0.500       | 1.347        | 2.577  |
| MnN <sub>2</sub> C                   | -5.539       | -0.443       | -0.219       | 1.281        | 2.511  |
| MnN <sub>3</sub>                     | -5.433       | -0.767       | 0.002        | 1.277        | 2.507  |
| MnC <sub>4</sub>                     | -2.404       | -2.980       | -0.180       | 0.644        | 1.874  |
| MnNC <sub>3</sub>                    | -2.260       | -2.629       | -0.457       | 0.426        | 1.656  |
| MnN <sub>2</sub> C <sub>2</sub> -opp | -2.286       | -2.564       | -0.432       | 0.362        | 1.592  |

|                                      |        |        |        |        |       |
|--------------------------------------|--------|--------|--------|--------|-------|
| MnN <sub>2</sub> C <sub>2</sub> -hex | -2.184 | -2.500 | -0.516 | 0.279  | 1.509 |
| MnN <sub>2</sub> C <sub>2</sub> -pen | -2.118 | -2.787 | -0.227 | 0.211  | 1.441 |
| MnN <sub>3</sub> C                   | -2.193 | -2.360 | -0.610 | 0.243  | 1.473 |
| MnN <sub>4</sub>                     | -1.924 | -2.367 | -0.610 | -0.019 | 1.211 |

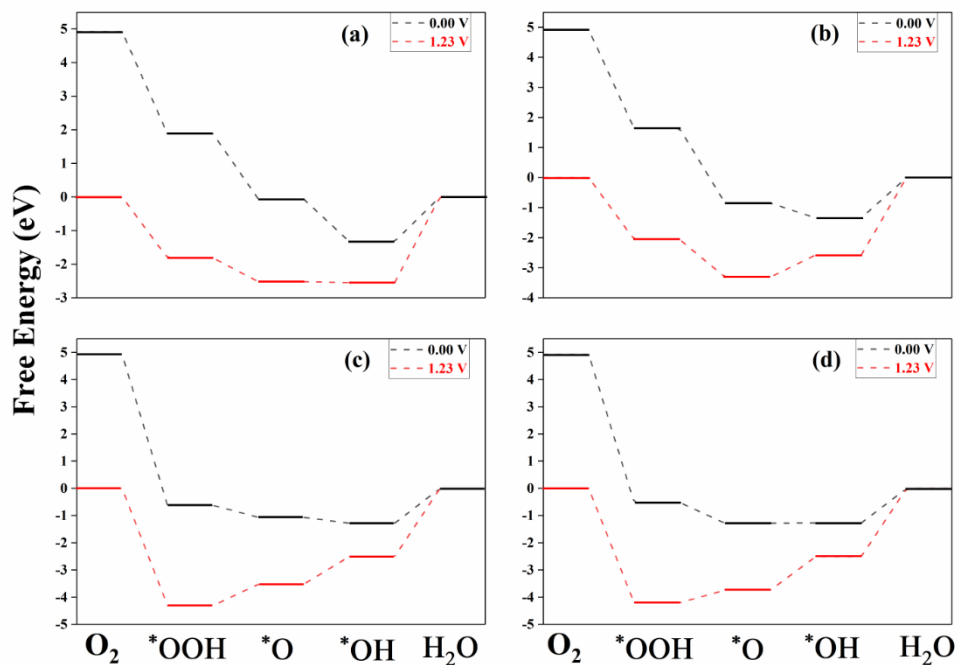

**Fig. S3.** The free energy (eV) diagrams of ORR pathways on three-coordinate structures. (a) MnC<sub>3</sub>, (b) MnNC<sub>2</sub>, (c) MnN<sub>2</sub>C, (d) MnN<sub>3</sub>.

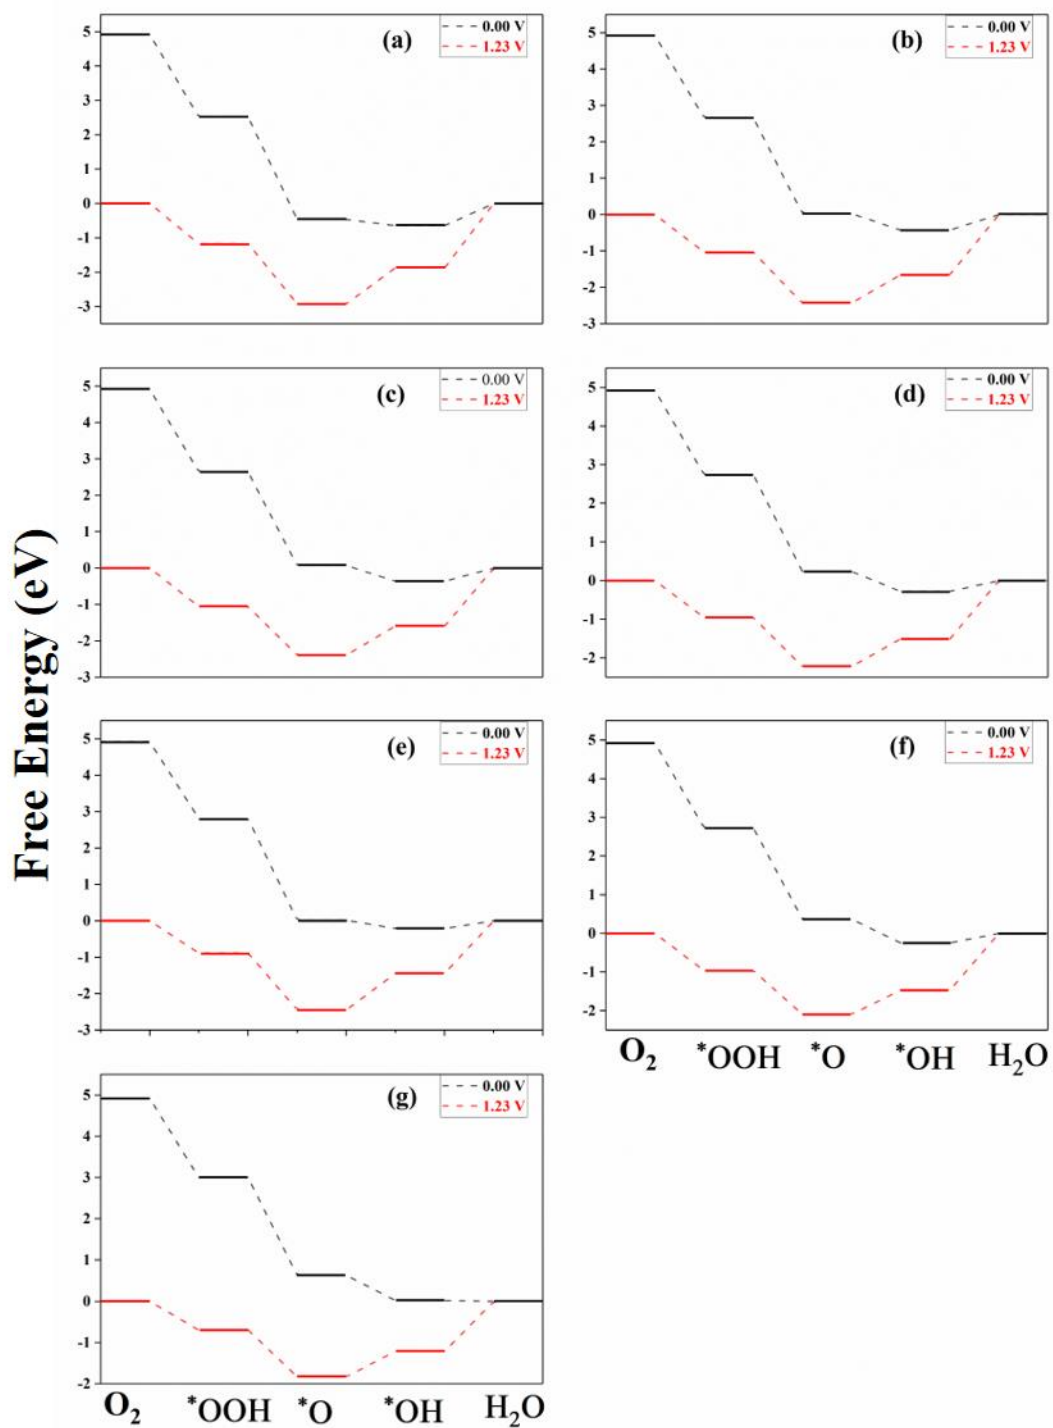

**Fig. S4.** The free energy diagrams of ORR pathways on four-coordinate structures. (a)  $MnC_4$ , (b)  $MnNC_3$ , (c)  $MnN_2C_2$ -opp, (d)  $MnN_2C_2$ -hex, (e)  $MnN_2C_2$ -pen, (f)  $MnN_3C$ , (g)  $MnN_4$ .

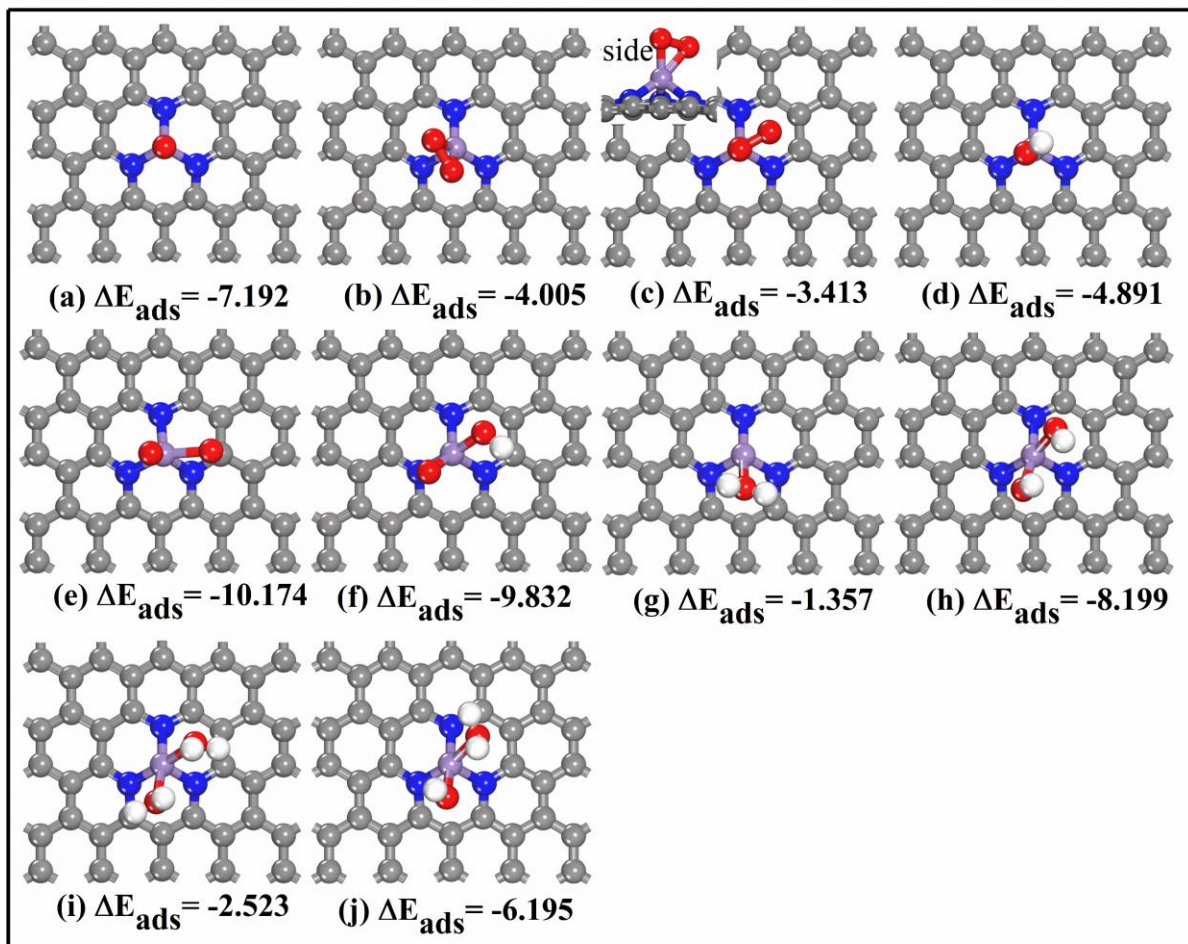

**Fig. S5.** The most stable adsorption configurations of the ORR intermediates on the  $\text{MnN}_3$ ,  $\Delta E_{\text{ads}}$  is the adsorption energy (eV).

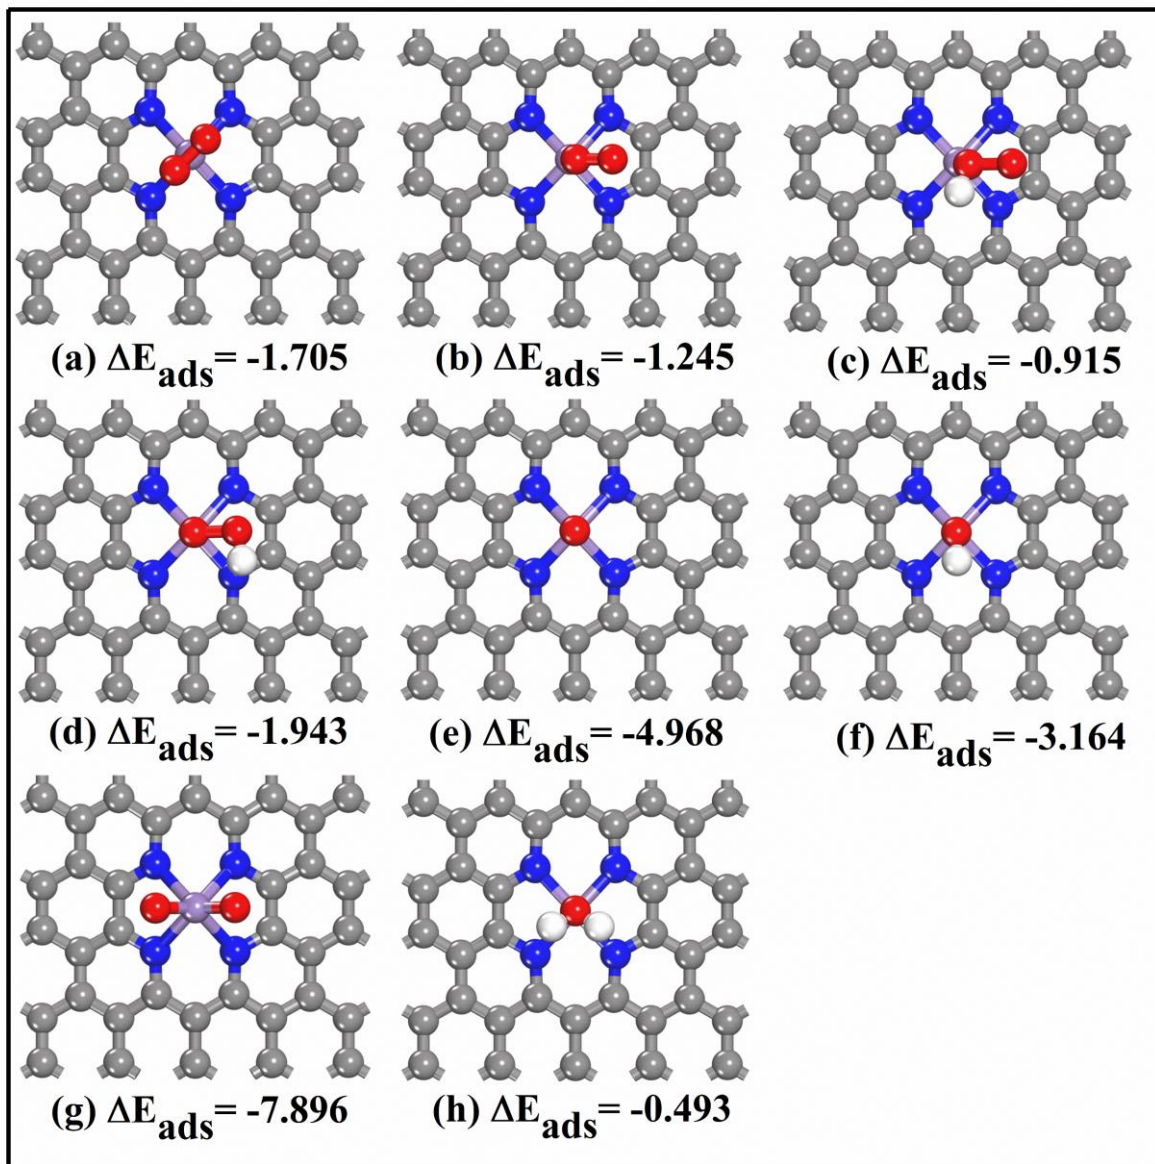

**Fig. S6.** The most stable adsorption configurations of the ORR intermediates on the  $\text{MnN}_4$ ,  $\Delta E_{\text{ads}}$  is the adsorption energy (eV).

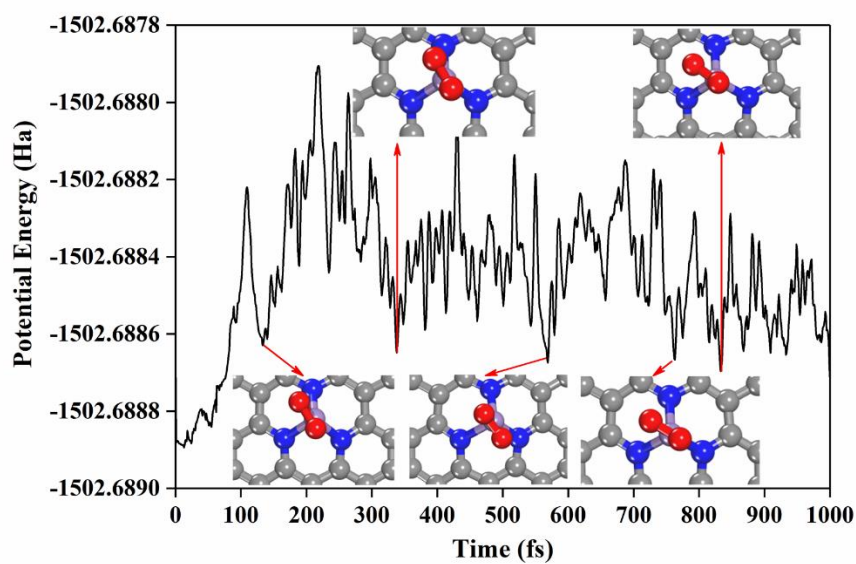



**Fig. S7.** The structural change of side- $\text{O}_2^1$  comes from the molecular dynamics of 300 K.

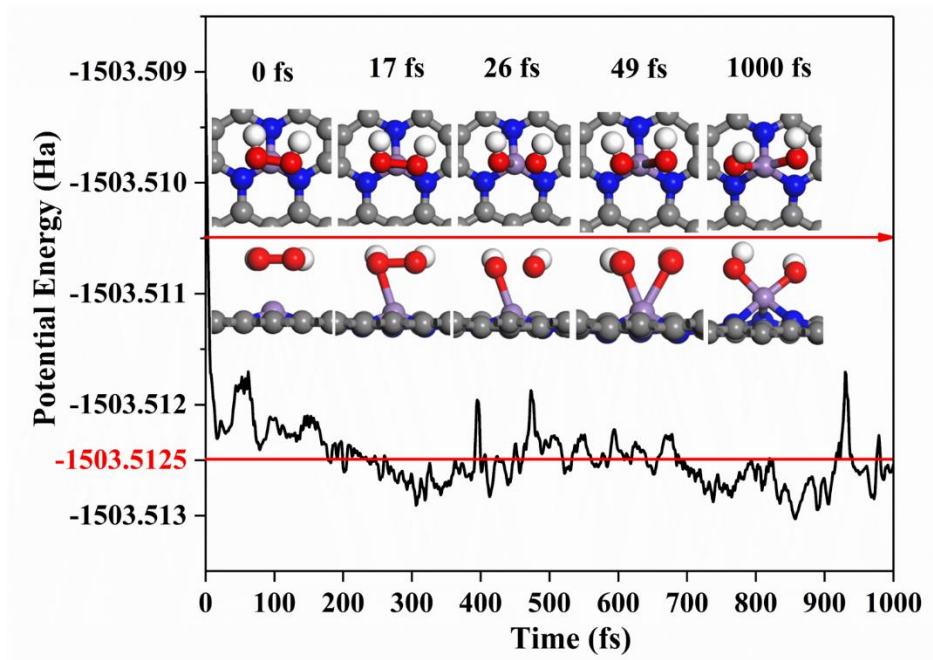

**Fig. S8.** The structural change of HOOH comes from the molecular dynamics of 300 K.

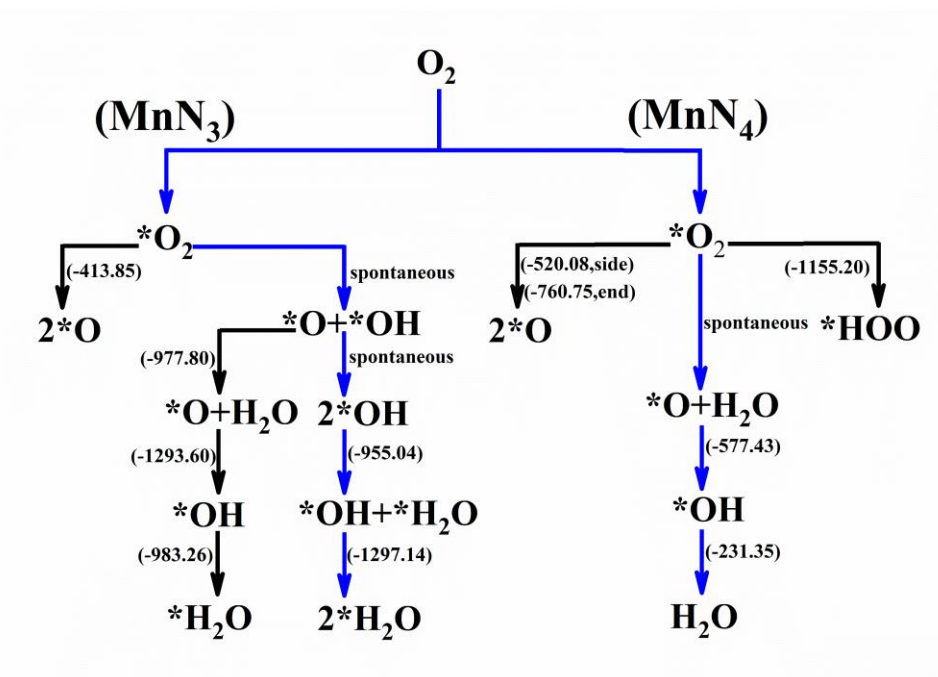

**Fig. S9.** The reaction pathway for ORR on  $\text{MnN}_3$  and  $\text{MnN}_4$ , the best path is marked with blue arrow. The numbers in parenthesis are imaginary frequencies ( $\text{cm}^{-1}$ ) of transition states. \* denotes that the ORR intermediate is adsorbed on the catalyst surface.

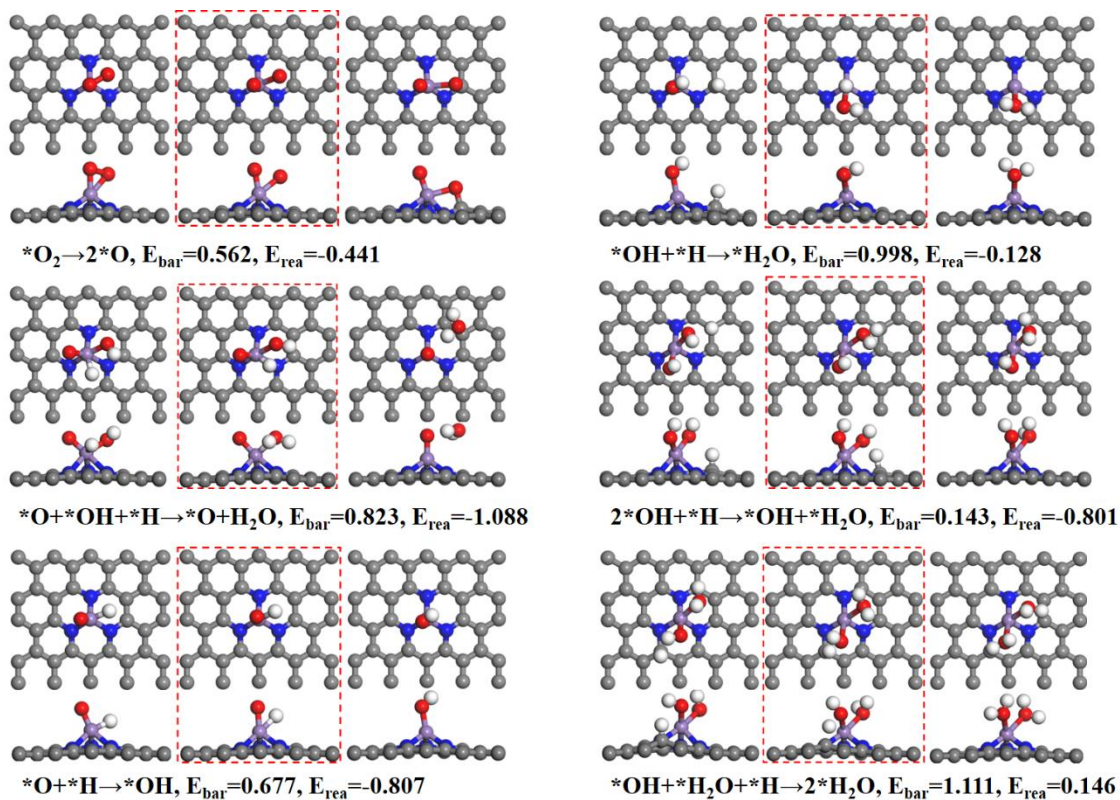

**Fig. S10.** Structures for the most favorable ORR pathway on  $MnN_3$ . From left to right in each row: initial state, transition state and final state, the transition state structure is selected with dashed frame.  $E_{\text{bar}}$  represents reaction barrier (eV) and  $E_{\text{rea}}$  represents reaction energy (eV).

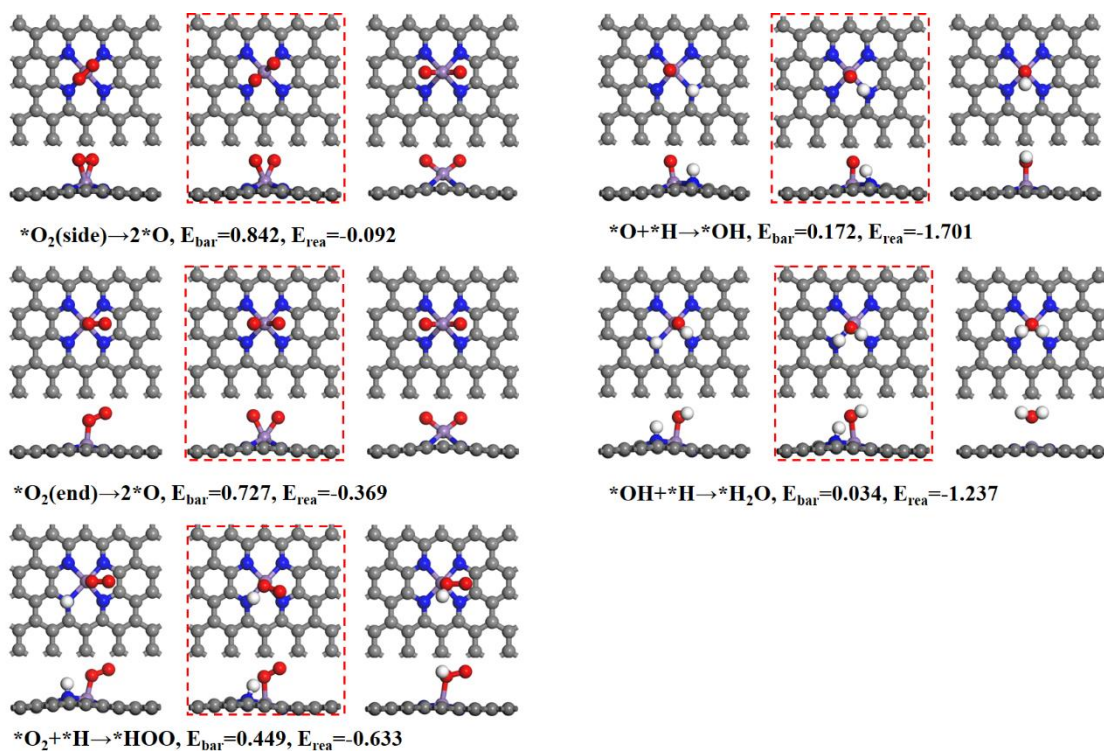

**Fig. S11.** Structures for the most favorable ORR pathway on  $MnN_4$ . From left to right in each row: initial state, transition state and final state, the transition state structure is selected with dashed frame.  $E_{\text{bar}}$  represents reaction barrier (eV) and  $E_{\text{rea}}$  represents reaction energy (eV).

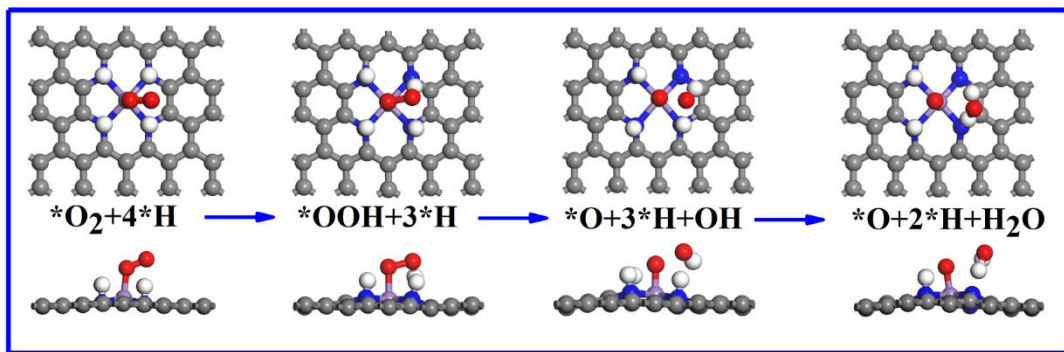

**Fig. S12.** The structural change of  $O_2$  comes from the molecular dynamics of 300 K.

**Table S4.** The adsorption energies (eV) of  $O_2$ , CO and  $O_2 + CO$  on  $MnN_x$ .

| Models                | $\Delta E_{\text{ads}}(\text{CO})$ | $\Delta E_{\text{ads}}(\text{O}_2)$ | $\Delta E_{\text{ads}}(\text{O}_2+\text{CO})$ |
|-----------------------|------------------------------------|-------------------------------------|-----------------------------------------------|
| $MnC_3$               | -1.506                             | -2.324                              | -2.749                                        |
| $MnNC_2$              | -1.864                             | -2.987                              | -3.393                                        |
| $MnN_2C$              | -1.899                             | -3.457                              | -4.103                                        |
| $MnN_3$               | -1.912                             | -3.182                              | -4.344                                        |
| $MnC_4$               | -1.205                             | -2.048                              | -2.339                                        |
| $MnNC_3$              | -1.331                             | -1.972                              | -2.276                                        |
| $MnN_2C_2\text{-Hex}$ | -1.448                             | -1.778                              | -2.490                                        |
| $MnN_2C_2\text{-Opp}$ | -1.318                             | -1.975                              | -2.283                                        |
| $MnN_2C_2\text{-Pen}$ | -1.424                             | -1.655                              | -2.327                                        |
| $MnN_3C$              | -1.460                             | -1.758                              | -2.135                                        |
| $MnN_4$               | -1.389                             | -1.449                              | -1.341                                        |

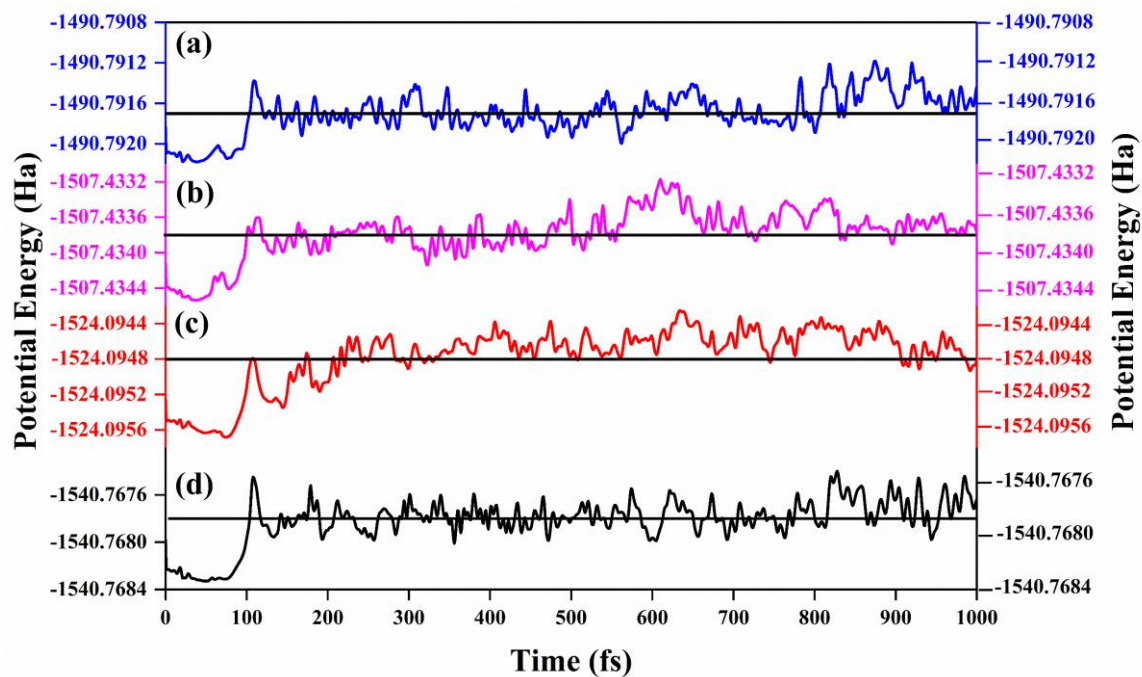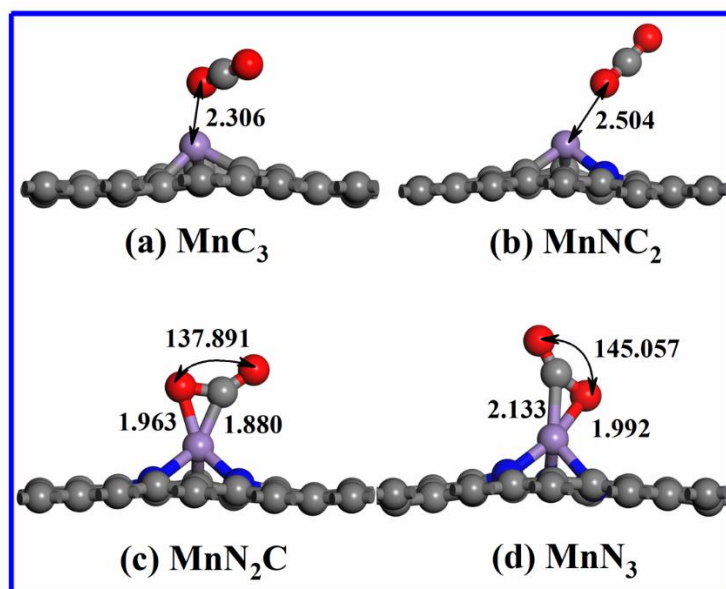

**Fig. S13.** The molecular dynamics simulation of (a)  $\text{MnC}_3$ , (b)  $\text{MnNC}_2$ , (c)  $\text{MnN}_2\text{C}$ , (d)  $\text{MnN}_3$  adsorbing  $\text{CO}_2$  at 300 K.

**Table S5.** Imaginary frequencies ( $\text{cm}^{-1}$ ) information of CO oxidation along various mechanisms on  $\text{MnN}_4$ .

|                                                               | TS1     | TS2     |
|---------------------------------------------------------------|---------|---------|
| ER                                                            | -596.97 | -392.29 |
| $*\text{O}_2 \rightarrow 2*\text{O}$                          | -593.22 |         |
| $*\text{O}_2 + \text{CO} \rightarrow *\text{O} + \text{CO}_2$ | -567.8  |         |
| NER                                                           | -268.92 | -154.22 |
| LH                                                            | -328.09 | -394.08 |

---

|                       |         |         |
|-----------------------|---------|---------|
| *O+CO→CO <sub>2</sub> | -615.65 |         |
| TER                   | -46.13  | -653.94 |

---
